# Supplementary material for: Network Pharmacology Integrated Molecular Docking Reveals the Mechanism of Anisodamine Hydrobromide Injection against Novel Coronavirus Pneumonia
Source: Evid Based Complement Alternat Med. 2020 Aug 5;2020:5818107. doi: 10.1155/2020/5818107 (PMC7411467; doi:10.1155/2020/5818107)
Supplement: Supplementary Materials — Table S1: the detailed information of targets of anisodamine. Table S2: the information of crucial targets of AHI's PIN. [file 5818107.f1.zip]

Archive with 2 entries (2 files):
- TableS1.docx
- TableS2.docx
